# Supplementary material for: Differential Effects of Comorbid Psychiatric Disorders on Treatment Outcome in Posttraumatic Stress Disorder from Childhood Trauma
Source: MDPI journal article supplement (doi:10.3390/jcm10163708), 2021-08-20
Supplement: s1 [file s1]

Supplementary Table S1. Secondary treatment outcomes by MDD and AD diagnosis and treatment condition across all assessment points.

| Outcome            |                 |                          |                |                 |                          |                |                          |                          |                |                 |                          |                 |                          |                 |                |
|--------------------|-----------------|--------------------------|----------------|-----------------|--------------------------|----------------|--------------------------|--------------------------|----------------|-----------------|--------------------------|-----------------|--------------------------|-----------------|----------------|
| IES-R index trauma |                 |                          |                | MDD no          |                          |                | MDD yes                  |                          |                |                 |                          | Time by MDD     |                          |                 |                |
| Timepoint          | N               | Estimated Means (95% CI) |                | d <sup>a</sup>  |                          | N              | Estimated Means (95% CI) |                          | d <sup>a</sup> |                 | t <sup>b</sup>           | df <sup>b</sup> | p <sup>b</sup>           |                 |                |
| Wait-list          | 33              | 52.13 (48.27 – 56.30)    |                | 0.19            |                          | 59             | 53.58 (50.53 – 56.83)    |                          | 0.21           |                 | 0.17                     | 115             | .87                      |                 |                |
| Pre-treatment      | 57              | 48.88 (44.99 – 53.10)    |                |                 |                          | 95             | 49.91 (46.81 – 53.21)    |                          |                |                 |                          |                 |                          |                 |                |
| Post-treatment     | 53              | 18.06 (13.65 – 23.88)    |                | 2.96            |                          | 86             | 21.37 (17.18 – 26.58)    |                          | 2.52           |                 | 0.90                     | 115             | .37                      |                 |                |
| 8-week Follow-up   | 47              | 15.50 (11.35 – 21.17)    |                | 3.41            |                          | 80             | 21.50 (16.91 – 27.34)    |                          | 2.50           |                 | 1.66                     | 115             | .10                      |                 |                |
| 1-year Follow-up   | 38              | 17.20 (12.24 – 24.15)    |                | 3.10            |                          | 68             | 17.95 (13.82 – 23.32)    |                          | 3.04           |                 | 0.11                     | 115             | .91                      |                 |                |
|                    | IR              |                          |                | EMDR            |                          |                | IR                       |                          |                | EMDR            |                          |                 | Time by treatment by MDD |                 |                |
|                    | Estimated Means |                          |                | Estimated Means |                          |                | Estimated Means          |                          |                | Estimated Means |                          |                 |                          |                 |                |
|                    | N               | (95% CI)                 | d <sup>a</sup> | N               | (95% CI)                 | d <sup>a</sup> | N                        | (95% CI)                 | d <sup>a</sup> | N               | (95% CI)                 | d <sup>a</sup>  | t <sup>b</sup>           | df <sup>b</sup> | p <sup>b</sup> |
| Wait-list          | 15              | 54.47<br>(48.70 – 60.93) | 0.15           | 18              | 49.89<br>(44.89 - 55.44) | 0.23           | 25                       | 53.16<br>(48.72 – 58.01) | 0.25           | 34              | 54.01<br>(49.92 – 58.43) | 0.17            | -0.61                    | 115             | .54            |
| Pre-treatment      | 28              | 51.71<br>(45.93 – 58.23) |                | 29              | 46.20<br>(41.15 – 51.85) |                | 45                       | 48.93<br>(44.58 – 53.70) |                | 50              | 50.91<br>(46.61 – 55.60) |                 |                          |                 |                |
| Post-treatment     | 27              | 24.62<br>(16.65 – 36.42) | 2.21           | 26              | 13.24<br>(8.88 – 19.73)  | 3.72           | 40                       | 22.28<br>(16.22 – 30.59) | 2.34           | 46              | 20.50<br>(15.20 – 27.66) | 2.70            | 1.17                     | 115             | .24            |
| 8-week Follow-up   | 22              | 23.80<br>(15.36 – 36.89) | 2.31           | 25              | 10.10<br>(6.48 – 15.72)  | 4.52           | 37                       | 19.17<br>(13.49 – 27.23) | 2.79           | 43              | 24.12<br>(17.38 – 33.47) | 2.22            | 2.54                     | 115             | .01            |
| 1-year Follow-up   | 19              | 25.45<br>(15.81 – 40.97) | 2.11           | 19              | 11.62<br>(7.16 – 18.86)  | 4.10           | 30                       | 14.52<br>(9.86 – 21.39)  | 3.61           | 38              | 22.19<br>(15.61 – 31.56) | 2.47            | 2.63                     | 115             | .01            |

| Outcome           |                 |                          |                |                 |                          |                |                          |                          |                |                 |                          |                 |                          |                 |                |
|-------------------|-----------------|--------------------------|----------------|-----------------|--------------------------|----------------|--------------------------|--------------------------|----------------|-----------------|--------------------------|-----------------|--------------------------|-----------------|----------------|
| IES-R all traumas |                 | MDD no                   |                |                 |                          |                |                          | MDD yes                  |                |                 |                          |                 |                          | Time by MDD     |                |
| Timepoint         | N               | Estimated Means (95% CI) |                | d <sup>a</sup>  |                          | N              | Estimated Means (95% CI) |                          | d <sup>a</sup> |                 | t <sup>b</sup>           | df <sup>b</sup> | p <sup>b</sup>           |                 |                |
| Wait-list         | 33              | 45.31 (41.01 – 50.06)    |                | 0.07            |                          | 59             | 48.19 (44.65 – 52.02)    |                          | 0.02           |                 | -0.50                    | 115             | .62                      |                 |                |
| Pre-treatment     | 57              | 43.90 (39.73 – 48.51)    |                |                 |                          | 94             | 47.69 (44.15 – 51.53)    |                          |                |                 |                          |                 |                          |                 |                |
| Post-treatment    | 53              | 21.90 (17.03 – 28.18)    |                | 1.47            |                          | 86             | 23.66 (19.43 – 28.80)    |                          | 1.48           |                 | -0.04                    | 115             | .97                      |                 |                |
| 8-week Follow-up  | 47              | 18.72 (14.31 – 24.48)    |                | 1.80            |                          | 80             | 23.38 (19.00 – 28.77)    |                          | 1.51           |                 | 0.94                     | 115             | .35                      |                 |                |
| 1-year Follow-up  | 38              | 20.30 (14.93 – 27.62)    |                | 1.63            |                          | 67             | 19.90 (15.69 – 25.25)    |                          | 1.85           |                 | -0.59                    | 115             | .56                      |                 |                |
|                   | IR              |                          |                | EMDR            |                          |                | IR                       |                          |                | EMDR            |                          |                 | Time by treatment by MDD |                 |                |
|                   | Estimated Means |                          |                | Estimated Means |                          |                | Estimated Means          |                          |                | Estimated Means |                          |                 |                          |                 |                |
|                   | N               | (95% CI)                 | d <sup>a</sup> | N               | (95% CI)                 | d <sup>a</sup> | N                        | (95% CI)                 | d <sup>a</sup> | N               | (95% CI)                 | d <sup>a</sup>  | t <sup>b</sup>           | df <sup>b</sup> | p <sup>b</sup> |
| Wait-list         | 15              | 50.87<br>(44.02 – 58.78) | 0.12           | 18              | 40.36<br>(35.18 – 46.30) | 0.02           | 25                       | 46.57<br>(41.60 – 52.13) | 0.04           | 34              | 49.87<br>(44.99 – 55.29) | 0.01            | 0.40                     | 115             | .69            |
| Pre-treatment     | 28              | 48.11<br>(41.69 – 55.51) |                | 29              | 40.06<br>(34.85 – 46.05) |                | 44                       | 45.75<br>(40.89 – 51.19) |                | 50              | 49.72<br>(44.71 – 55.29) |                 |                          |                 |                |
| Post-treatment    | 27              | 26.70<br>(18.72 – 38.07) | 1.24           | 26              | 17.97<br>(12.57 – 25.69) | 1.69           | 40                       | 22.97<br>(17.25 – 30.59) | 1.46           | 46              | 24.37<br>(18.61 – 31.91) | 1.51            | 0.69                     | 115             | .50            |
| 8-week Follow-up  | 22              | 25.80<br>(17.63 – 37.74) | 1.32           | 25              | 13.58<br>(9.30 – 19.83)  | 2.28           | 37                       | 21.29<br>(15.72 – 28.82) | 1.62           | 43              | 25.68<br>(19.34 – 34.10) | 1.39            | 1.89                     | 115             | .06            |
| 1-year Follow-up  | 19              | 28.09<br>(18.21 – 43.32) | 1.14           | 19              | 14.68<br>(9.48 – 22.72)  | 2.12           | 29                       | 14.23<br>(9.98 – 20.29)  | 2.47           | 38              | 27.83<br>(20.27 – 38.22) | 1.23            | 3.03                     | 115             | .003           |

| IES-R index trauma |    |                          |  | AD no          |    |                          | AD yes |                |  | Time by AD     |                 |                |  |  |
|--------------------|----|--------------------------|--|----------------|----|--------------------------|--------|----------------|--|----------------|-----------------|----------------|--|--|
| Timepoint          | N  | Estimated Means (95% CI) |  | d <sup>a</sup> | N  | Estimated Means (95% CI) |        | d <sup>a</sup> |  | t <sup>b</sup> | df <sup>b</sup> | p <sup>b</sup> |  |  |
| Wait-list          | 36 | 50.11 (46.67 – 53.81)    |  | 0.19           | 56 | 55.15 (51.91 – 58.60)    |        | 0.21           |  | 0.24           | 118             | .81            |  |  |
| Pre-treatment      | 66 | 47.06 (43.59 – 50.79)    |  |                | 86 | 51.31 (47.95 – 54.90)    |        |                |  |                |                 |                |  |  |
| Post-treatment     | 63 | (17.25 (13.40 – 22.20)   |  | 2.98           | 76 | 22.13 (17.62 – 27.80)    |        | 2.50           |  | 1.03           | 118             | .31            |  |  |
| 8-week Follow-up   | 57 | 18.19 (13.98 – 23.67)    |  | 2.83           | 70 | 20.65 (16.26 – 26.22)    |        | 2.71           |  | 0.24           | 118             | .81            |  |  |
| 1-year Follow-up   | 52 | 17.18 (12.80 – 23.06)    |  | 2.99           | 54 | 20.06 (15.20 – 26.49)    |        | 2.79           |  | 0.37           | 118             | .72            |  |  |

  

|                  | IR              |                          |                | EMDR            |                          |                | IR              |                          |                | EMDR            |                          |                | Time by treatment by AD |                 |                |
|------------------|-----------------|--------------------------|----------------|-----------------|--------------------------|----------------|-----------------|--------------------------|----------------|-----------------|--------------------------|----------------|-------------------------|-----------------|----------------|
|                  | Estimated Means |                          |                | Estimated Means |                          |                | Estimated Means |                          |                | Estimated Means |                          |                | t <sup>b</sup>          | df <sup>b</sup> | p <sup>b</sup> |
|                  | N               | (95% CI)                 | d <sup>a</sup> |                         |                 |                |
| Wait-list        | 17              | 51.86<br>(46.90 – 57.35) | 0.16           | 19              | 48.42<br>(43.77 – 53.56) | 0.21           | 23              | 55.30<br>(50.44 – 60.63) | 0.26           | 33              | 55.01<br>(50.83 – 59.52) | 0.18           | -0.10                   | 118             | .39            |
| Pre-treatment    | 36              | 49.14<br>(44.28 – 54.53) |                | 30              | 45.06<br>(40.29 – 50.39) |                | 37              | 50.78<br>(45.87 – 56.22) |                | 49              | 51.84<br>(47.41 – 56.67) |                |                         |                 |                |
| Post-treatment   | 36              | 22.83<br>(16.39 – 31.82) | 2.28           | 27              | 13.03<br>(8.90 – 19.07)  | 3.69           | 31              | 23.49<br>(16.59 – 33.27) | 2.29           | 45              | 20.85<br>(15.52 – 28.01) | 2.71           | -1.94                   | 118             | .06            |
| 8-week Follow-up | 30              | 21.94<br>(15.43 – 31.20) | 2.40           | 27              | 15.07<br>(10.19 – 22.30) | 3.26           | 29              | 20.08<br>(13.94 – 28.94) | 2.76           | 41              | 21.22<br>(15.58 – 28.90) | 2.66           | -0.77                   | 118             | .45            |
| 1-year Follow-up | 29              | 16.80<br>(11.33 – 24.93) | 3.19           | 23              | 17.56<br>(11.34 – 27.18) | 2.80           | 20              | 21.91<br>(14.25 – 33.69) | 2.50           | 34              | 18.37<br>(12.92 – 26.11) | 3.08           | -0.18                   | 118             | .86            |

| IES-R all traumas |    | AD no                    |  |                | AD yes |                          |  | Time by AD     |                |                 |                |
|-------------------|----|--------------------------|--|----------------|--------|--------------------------|--|----------------|----------------|-----------------|----------------|
| Timepoint         | N  | Estimated Means (95% CI) |  | d <sup>a</sup> | N      | Estimated Means (95% CI) |  | d <sup>a</sup> | t <sup>b</sup> | df <sup>b</sup> | p <sup>b</sup> |
| Wait-list         | 36 | 45.29 (41.30 – 49.66)    |  | 0.02           | 56     | 48.54 (44.85 – 52.54)    |  | 0.05           | 0.40           | 114             | .69            |
| Pre-treatment     | 65 | 44.90 (41.00 – 49.18)    |  |                | 86     | 47.33 (43.67 – 51.30)    |  |                |                |                 |                |
| Post-treatment    | 63 | 22.66 (17.96 – 28.60)    |  | 1.44           | 76     | 23.16 (18.75 – 28.60)    |  | 1.51           | -0.23          | 114             | .82            |
| 8-week Follow-up  | 57 | 21.52 (16.90 – 27.40)    |  | 1.55           | 70     | 21.51 (17.27 – 26.78)    |  | 1.67           | -0.37          | 114             | .71            |
| 1-year Follow-up  | 51 | 21.47 (16.33 – 28.23)    |  | 1.56           | 54     | 20.87 (16.10 – 27.06)    |  | 1.73           | -0.49          | 114             | .63            |

|                  | IR              |                          |                | EMDR            |                          |                | IR              |                          |                | EMDR            |                          |                | Time by treatment by AD |                 |                |
|------------------|-----------------|--------------------------|----------------|-----------------|--------------------------|----------------|-----------------|--------------------------|----------------|-----------------|--------------------------|----------------|-------------------------|-----------------|----------------|
|                  | Estimated Means |                          |                | Estimated Means |                          |                | Estimated Means |                          |                | Estimated Means |                          |                | t <sup>b</sup>          | df <sup>b</sup> | p <sup>b</sup> |
|                  | N               | (95% CI)                 | d <sup>a</sup> |                         |                 |                |
| Wait-list        | 17              | 47.71<br>(41.92 – 54.30) | 0.05           | 19              | 42.99<br>(37.70 – 49.02) | 0.01           | 23              | 48.64<br>(43.15 – 54.83) | 0.09           | 33              | 48.45<br>(43.69 – 53.72) | 0.01           | -0.09                   |                 | .93            |
| Pre-treatment    | 35              | 46.66<br>(41.20 – 52.84) |                | 30              | 43.21<br>(37.84 – 49.35) |                | 37              | 46.60<br>(41.29 – 52.60) |                | 49              | 48.08<br>(43.24 – 53.47) |                |                         |                 |                |
| Post-treatment   | 36              | 25.72<br>(18.88 – 35.05) | 1.26           | 27              | 19.97<br>(14.10 – 28.27) | 1.63           | 31              | 23.02<br>(16.69 – 31.76) | 1.49           | 45              | 23.29<br>(17.72 – 30.62) | 1.53           | 0.58                    |                 | .56            |
| 8-week Follow-up | 30              | 26.15<br>(18.90 – 36.18) | 1.22           | 27              | 17.70<br>(12.38 – 25.32) | 1.88           | 29              | 19.75<br>(14.14 – 27.60) | 1.81           | 41              | 23.42<br>(17.63 – 31.10) | 1.52           | 1.59                    |                 | .11            |
| 1-year Follow-up | 28              | 20.73<br>(14.34 – 29.98) | 1.71           | 23              | 22.24<br>(14.85 – 33.32) | 1.40           | 20              | 18.50<br>(12.36 – 27.71) | 1.95           | 34              | 23.54<br>(16.99 – 32.62) | 1.51           | 0.19                    |                 | .85            |

Abbreviations: IES-R, Impact of Event Scale-Revised; MDD, Major Depressive Disorder; AD, Anxiety Disorder; IR, Imagery Rescripting; EMDR, Eye Movement Desensitization and Reprocessing.

Note. Analyses by Generalized Linear Mixed Models (GLMM), using a Negative Binomial Distribution with a loglink to deal with the skewed distribution of the dependent variable, an unstructured covariance structure for the repeated part, and a random effect of time at the level of site (see [22]).

<sup>a</sup>Effect size calculated for treatment condition compared to pre-treatment, based on estimated means in the transformed scale and the baseline standard deviation derived from the pre-treatment variance estimated with a GLMM analysis with only an unstructured repeated part and a fixed intercept [11]. Because of unequal sample sizes in the four groups (MDD/AD and IR, MDD/AD and EMDR, no MDD/AD and IR, no MDD/AD and EMDR), the average effect sizes are higher than the primary analysis [10].

<sup>b</sup>differences between treatments and diagnosis of MDD/AD in change from pre-treatment based on a repeated GLMM using centered, dimensional predictors to interpret lower-level interactions.

Supplementary Table S2. Primary outcome CAPS-5 by Mood Disorder (MD) diagnosis and treatment condition across all assessment points.

| Timepoint        | MD no           |                          |                | MD yes          |                          |                | Time by MD      |                          |                |                 |                          |      |                         |                 |                |
|------------------|-----------------|--------------------------|----------------|-----------------|--------------------------|----------------|-----------------|--------------------------|----------------|-----------------|--------------------------|------|-------------------------|-----------------|----------------|
|                  | N               | Estimated Means (95% CI) | d <sup>a</sup> | N               | Estimated Means (95% CI) | d <sup>a</sup> | t <sup>b</sup>  | df <sup>b</sup>          | p <sup>b</sup> |                 |                          |      |                         |                 |                |
| Wait-list        | 21              | 38.74 (34.50 – 43.50)    | 0.08           | 67              | 40.22 (36.57 – 44.24)    | 0.15           | 0.50            | 100                      | .62            |                 |                          |      |                         |                 |                |
| Pre-treatment    | 40              | 37.62 (33.79 – 41.88)    |                | 107             | 38.02 (34.87 – 41.47)    |                |                 |                          |                |                 |                          |      |                         |                 |                |
| Post-treatment   | 38              | 21.67 (17.30 – 27.14)    | 1.44           | 93              | 23.21 (20.03 – 26.89)    | 1.29           | 0.52            | 100                      | .61            |                 |                          |      |                         |                 |                |
| 8-week Follow-up | 36              | 17.94 (13.85 – 23.23)    | 1.93           | 90              | 19.36 (16.38 – 22.88)    | 1.76           | 0.50            | 100                      | .62            |                 |                          |      |                         |                 |                |
| 1-year Follow-up | 30              | 17.50 (13.11 – 23.37)    | 2.00           | 75              | 16.18 (13.42 – 19.51)    | 2.23           | -0.57           | 100                      | .57            |                 |                          |      |                         |                 |                |
|                  | IR              |                          |                | EMDR            |                          |                | IR              |                          |                | EMDR            |                          |      | Time by treatment by MD |                 |                |
|                  | Estimated Means |                          |                | Estimated Means |                          |                | Estimated Means |                          |                | Estimated Means |                          |      | t <sup>b</sup>          | df <sup>b</sup> | p <sup>b</sup> |
| N                | (95% CI)        | d <sup>a</sup>           | N              | (95% CI)        | d <sup>a</sup>           | N              | (95% CI)        | d <sup>a</sup>           | N              | (95% CI)        | d <sup>a</sup>           |      |                         |                 |                |
| Wait-list        | 9               | 40.04<br>(34.20 – 46.87) | 0.05           | 12              | 37.48<br>(32.57 – 43.14) | 0.10           | 30              | 40.43<br>(36.43 – 44.88) | 0.14           | 37              | 40.01<br>(35.93 – 44.56) | 0.15 | -0.18                   | 110             | .85            |
| Pre-treatment    | 17              | 39.30<br>(33.99 – 45.45) |                | 23              | 36.01<br>(31.65 – 40.97) |                | 53              | 38.30<br>(34.78 – 42.18) |                | 54              | 37.75<br>(34.19 – 41.69) |      |                         |                 |                |
| Post-treatment   | 18              | 24.21<br>(17.52 – 33.46) | 1.26           | 20              | 19.40<br>(14.35 – 26.23) | 1.61           | 46              | 24.71<br>(20.22 – 30.18) | 1.14           | 47              | 21.81<br>(17.84 – 26.65) | 1.43 | 0.11                    | 110             | .91            |
| 8-week Follow-up | 16              | 22.11<br>(15.22 – 32.13) | 1.50           | 20              | 14.55<br>(10.28 – 20.60) | 2.36           | 43              | 18.71<br>(14.83 – 23.60) | 1.87           | 47              | 20.03<br>(15.97 – 25.13) | 1.65 | 1.60                    | 110             | .11            |
| 1-year Follow-up | 14              | 23.48<br>(15.45 – 35.38) | 1.35           | 16              | 13.10<br>(8.84 – 19.43)  | 2.64           | 35              | 13.44<br>(10.29 – 17.55) | 2.73           | 40              | 19.48<br>(15.16 – 25.04) | 1.72 | 2.83                    | 110             | .006           |

Abbreviations: CAPS-5, Clinical Administered PTSD Scale for DSM-5; MD, Mood Disorder; IR, Imagery Rescripting; EMDR, Eye Movement Desensitization and Reprocessing.

Note. Analyses by Generalized Linear Mixed Models (GLMM), using a Negative Binomial Distribution with a loglink to deal with the skewed distribution of the dependent variable, an unstructured covariance structure for the repeated part, and a random effect of time at the level of site (see [22]).

<sup>a</sup>Effect size calculated for treatment condition compared to pre-treatment, based on estimated means in the transformed scale and the baseline standard deviation derived from the pre-treatment variance estimated with a GLMM analysis with only an unstructured repeated part and a fixed intercept [11]. Because of unequal sample sizes in the four groups (MD and IR, MD and EMDR, no MD and IR, no MD and EMDR), the average effect sizes are higher than the primary analysis [10].

<sup>b</sup>differences between treatments and MD diagnosis change from pre-treatment based on a repeated GLMM using centered, dimensional predictors to interpret lower-level interactions.
